# Supplementary material for: Field test of an active flap system on a full scale wind turbine
Source: Copernicus journal article supplement (doi:10.5194/wes-2020-21), 2020-03-11
Supplement: Supplementary file [file wes-2020-21-RC1-supplement.pdf]

The article concerns a field test and an aeroelastic investigation of the use flaps on a full-scale wind turbine. The article is interesting in that this is first results of an investigating of using flaps on a full-scale MW wind turbine, and as such it deserves publication. However, several issues needs to be ameliorated before the present paper can be published.

- I understand that it is not the purpose of the article to make a full literature review of the subject. However, this sound more like an excuse for not digging more into the pertinent literature. Nearly all reference and cited papers are related to own previous works. To justify publication, it is required more explicitly to argue the originality of the work and how it is inscribed in other literature and investigations.
- In the paper we learn that there is an effect of using active flaps, and that this effect indeed can be measured through the flapwise root moment. However, as we can see on Fig. 4 there is also a price to pay with respect to aerodynamic efficiency at high angles of attack. I think this balance between enhanced aeroelastic features vs the changed aerodynamics should be discussed. Furthermore, a general discussion of the motivation for using the flaps and a discussion of the potential gain of the achieved results are required, like, is a potential load impact of 5-10 % worthwhile of going after?
- Legends explaining the colors in Fig.6 are missing.
- Besides being limited to own research work, the citations and reference list is incomplete. On page 11 there are references to Fisker (2011) and Enevoldsen (2018) that do not appear in the reference list.
